## Referees for Volume 49

The Editors are pleased to record their thanks to all those listed below who gave of their time and expertise to referee manuscripts submitted for Volume 49 of the *Journal*.

|                        |                      |                  |
|------------------------|----------------------|------------------|
| Arlhuir, R.            | Groot, S. J. de      | Pepin, P.        |
| Austin, B.             | Hammond, P.          | Pitcher, T. J.   |
| Bailey, R. S.          | Hansen, L. P.        | Raensnil, B.     |
| Bakun, A.              | Heath, M.            | Raffaelli, D. G. |
| Bannister, R. C. A.    | Heessen, H. J. L.    | Rees, H. L.      |
| Beek, van F. A.        | Hislop, J. (3)       | Rowell, T. W.    |
| Beverton, R. J. H. (5) | Hjelmeland, K.       | Sampson, D.      |
| Blaxter, J. H. S. (3)  | Horwood, J. W. (3)   | Serchuk, F. M.   |
| Boletsky, S. V.        | Iles, T. C. (2)      | Shearer, W.      |
| Bromley, P. J.         | Jobling, M.          | Shepherd, J. G.  |
| Buche, D.              | Johannessen, A.      | Sigurjonsson, J. |
| Carey, F. G.           | Keegan, B.           | Simmonds, J.     |
| Castonguay, M.         | Kunzlik, P. A.       | Smith, S. J.     |
| Clark, W. G.           | Lockyer, C.          | Sparholt, H.     |
| Colebrook, J. M.       | Longhurst, A. R.     | Spies, R. B.     |
| Cook, R. M.            | Lopez-Jamar, E.      | Stefánsson, G.   |
| Corten, A. D.          | Lough, R. G.         | Stirling, H.     |
| Daan, N.               | Macer, C. T.         | Stokes, T. K.    |
| Foote, K. G.           | MacKenzie, K.        | Talbot, C.       |
| Frank, K. T.           | MacLennan, D. N. (2) | Thompson, P.     |
| Fryer, R. J. (2)       | Mason, J.            | Thorpe, J.       |
| Fuiman, L. A.          | Mauchline, J.        | Tytler, P.       |
| Geffen, A.             | McCleave, J. D.      | Walker, A. F.    |
| Gibson, R. N.          | McIntyre, A. D.      | Wardle, C. S.    |
| Gislason, H.           | Mesnil, B.           | Warlen, S.       |
| Godø, O. R.            | Mills, D. H.         | Warwick, R. M.   |
| Graitrowicz, E. M.     | Munk, P.             | Wells, J. B. J.  |
| Gray, J. S. (2)        | Nicholson, M. D. (3) | Wootton, R. J.   |
| Greenlaw, C. F. (2)    | Pearson, T.          |                  |
